# Supplementary material
Source: Springer Nature journal article supplement (https://www.springermedizin.de/resource/supplementary/13256_2010_1597_MOESM1_ESM.pdf/9648022)

**A**

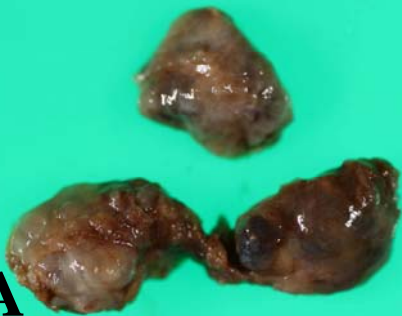

**B**

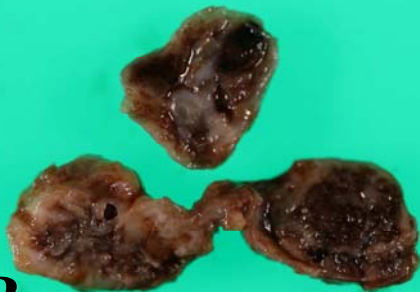

Supplement: MOESM1 [file 9648022]
